# Supplementary material for: Tissue metabolomics study to reveal the toxicity of a traditional Tibetan medicine ‘Renqing Changjue’ in rats
Source: Royal Society of Chemistry journal article supplement (doi:10.1039/c8ra07058j), 2018-01-01
Supplement: c8ra07058j1.pdf [file c8ra07058j1.pdf]

## Supplementary files

### Tissue metabolomics study to reveal the toxicity of a Traditional Tibetan medicines ‘Renqing Changjue’ in rat

Can Xu<sup>a#</sup>, Yingfeng Wang<sup>a#</sup>, Caidan Rezeng<sup>c#</sup>, Lan Zhang<sup>a</sup>, Baosheng Zhao<sup>b</sup>, Xia Wang<sup>a</sup>,  
Xiuyuan Wu<sup>a</sup>, Zhongfeng Li<sup>a\*</sup>, Jianxin Chen<sup>b\*</sup>

a Department of Chemistry, Capital Normal University, No.105, Xisanhuanbeilu, Haidian District, Beijing 100048, P R China

b Beijing University of Chinese Medicine, No.11 Beisanhuandonglu, Chaoyang District, Beijing 100029, PR China

c College of Pharmacy, Qinghai Nationalities University, No.3 Bayizhong Road, Xining, 810000, PR China

**\*To whom correspondence should be addressed:**

Zhongfeng Li

Department of Chemistry, Capital Normal University,

No.105 Xisanhuanbeilu, Haidian District,

Beijing 100048, China

Tel: +86-10-68902655

Fax: +86-10-68902687

E-mail: [lizf@cnu.edu.cn](mailto:lizf@cnu.edu.cn)

Jianxin Chen

Beijing University of Chinese Medicine,

No.11 Beisanhuandonglu, Chaoyang District,

Beijing 100029, China.

E-mail: [cjx@bucm.edu.cn](mailto:cjx@bucm.edu.cn)

Fax: +86-010-64286283; Tel: +86-010-64286508

# Can Xu, Yingfeng Wang, Caidan Rezeng contributed equally to this work.

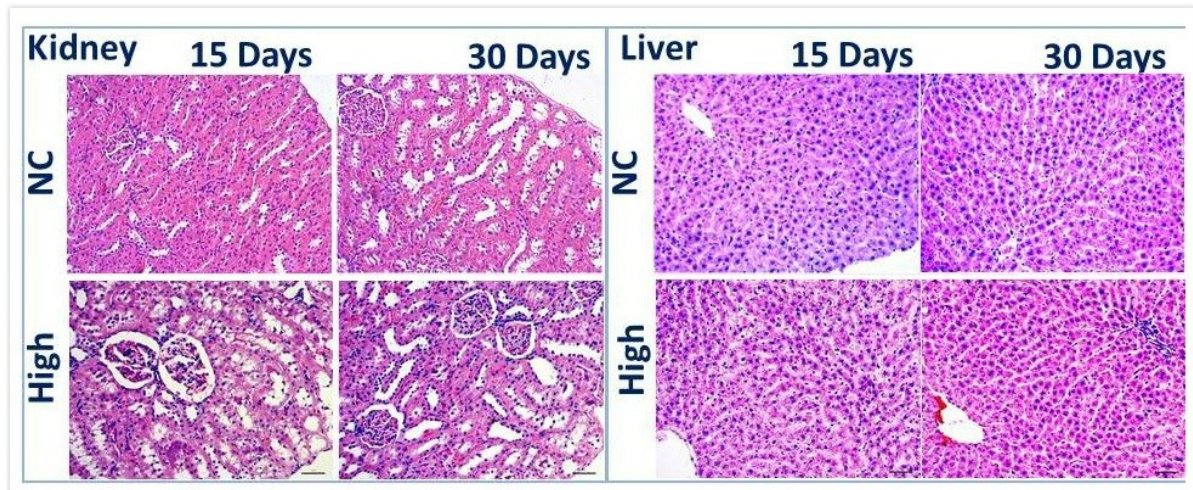

**Fig. S1.** Histopathological examination of control and HD group liver and kidney tissues by H&E staining (10 $\times$ ).

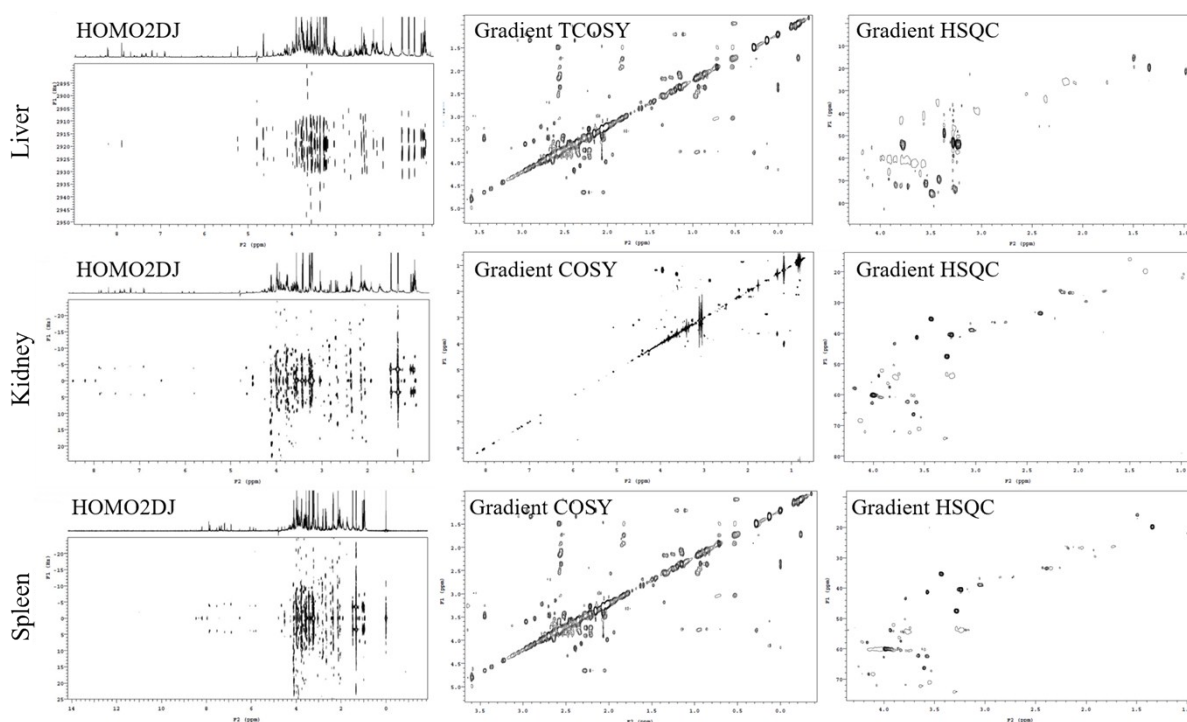

**Fig. S2. Standard two-dimensional (2D) NMR spectra of liver, kidney and spleen**

Parameters: For COSY and HSQC, 64 transients per increment and 128 increments were collected in the indirect dimension. A SINE function with 2048 and 1024 digital points was used for processing. Exponential multiplications of 0.20 and 0.30 Hz in the direct and indirect dimension were used, respectively. HSQC was processed using the SINE function. Exponential multiplications of 0.20 and 0.30 Hz in the direct and indirect dimension were used, respectively. In addition, a Gaussian multiplication of 0.1 Hz in the indirect dimension was applied for the HSQC. Two dimensional J-resolved spectra were also recorded to aid the assignments of the metabolites. The pulse sequence is of the form -RD-90-t1-180-t1-ACQ. The RD was 2 s, and the number of scans was 1 for all experiments.

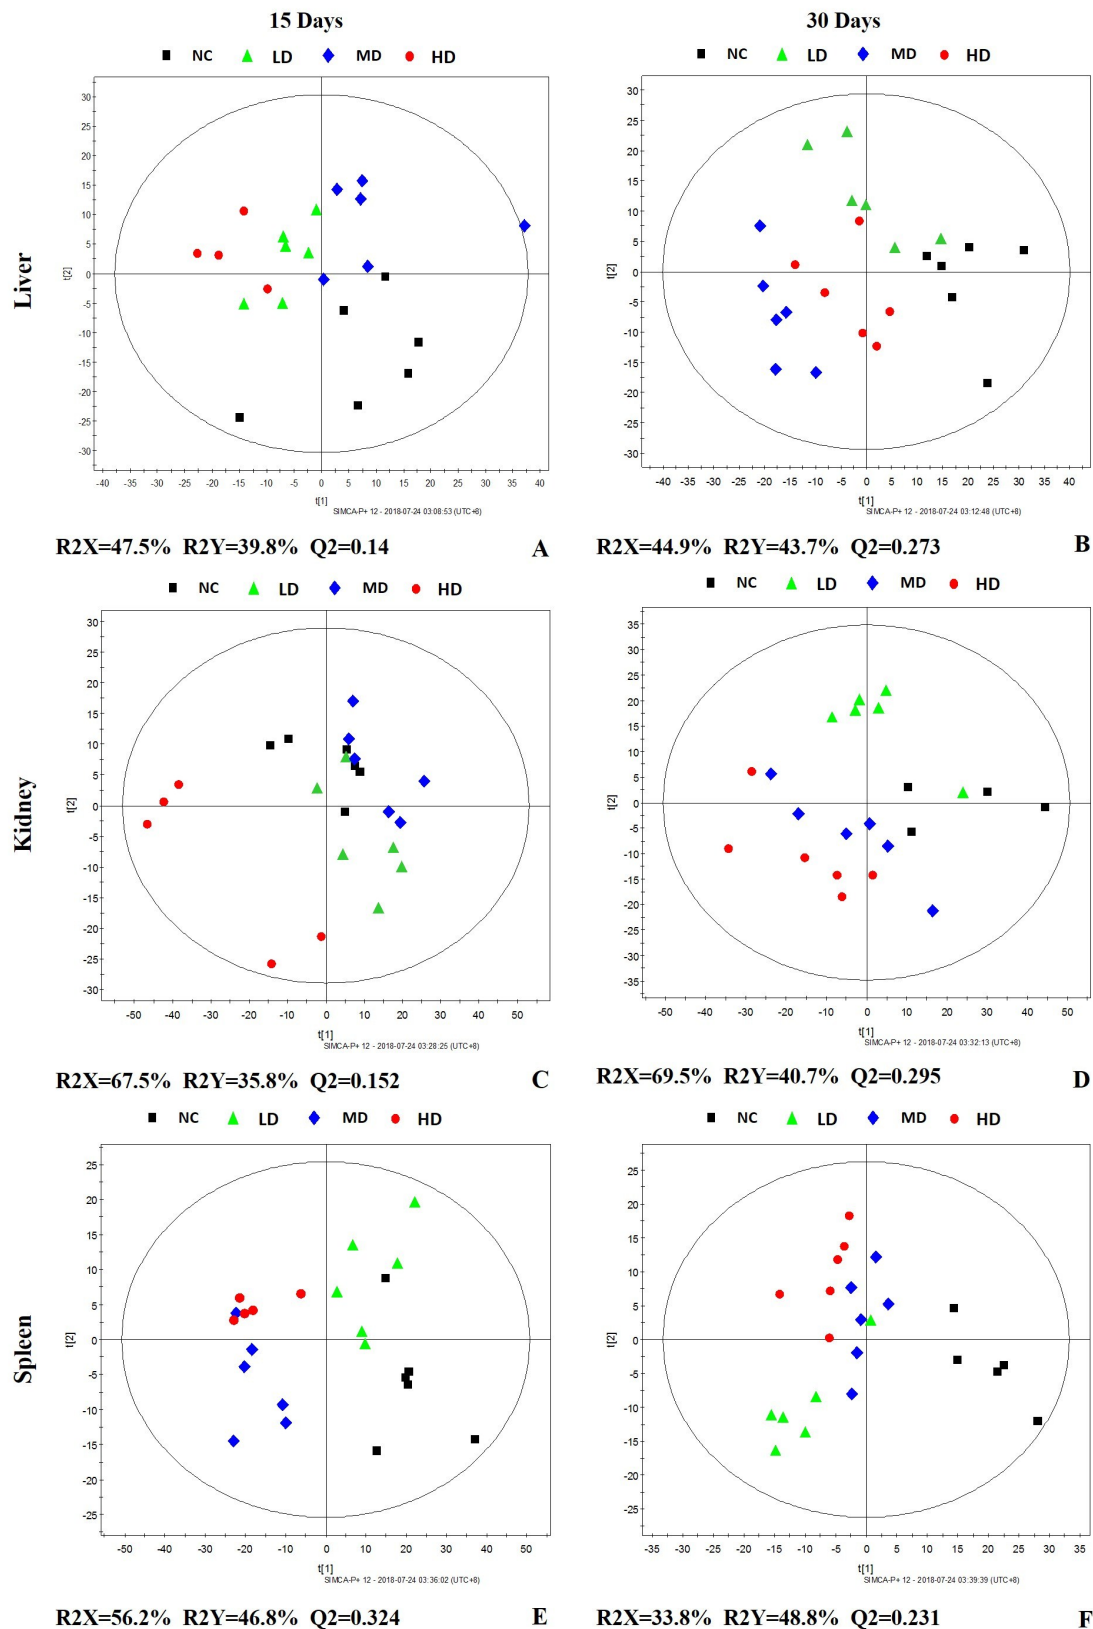

**Fig. S3.** Representative PLS-DA score plots ( $t_1$  vs.  $t_2$ ) derived from the  $^1\text{H}$  NMR data of liver extract (A and B), kidney extract (C and D), and spleen extract (E and F) from control and dosed groups at day 15 and day 30

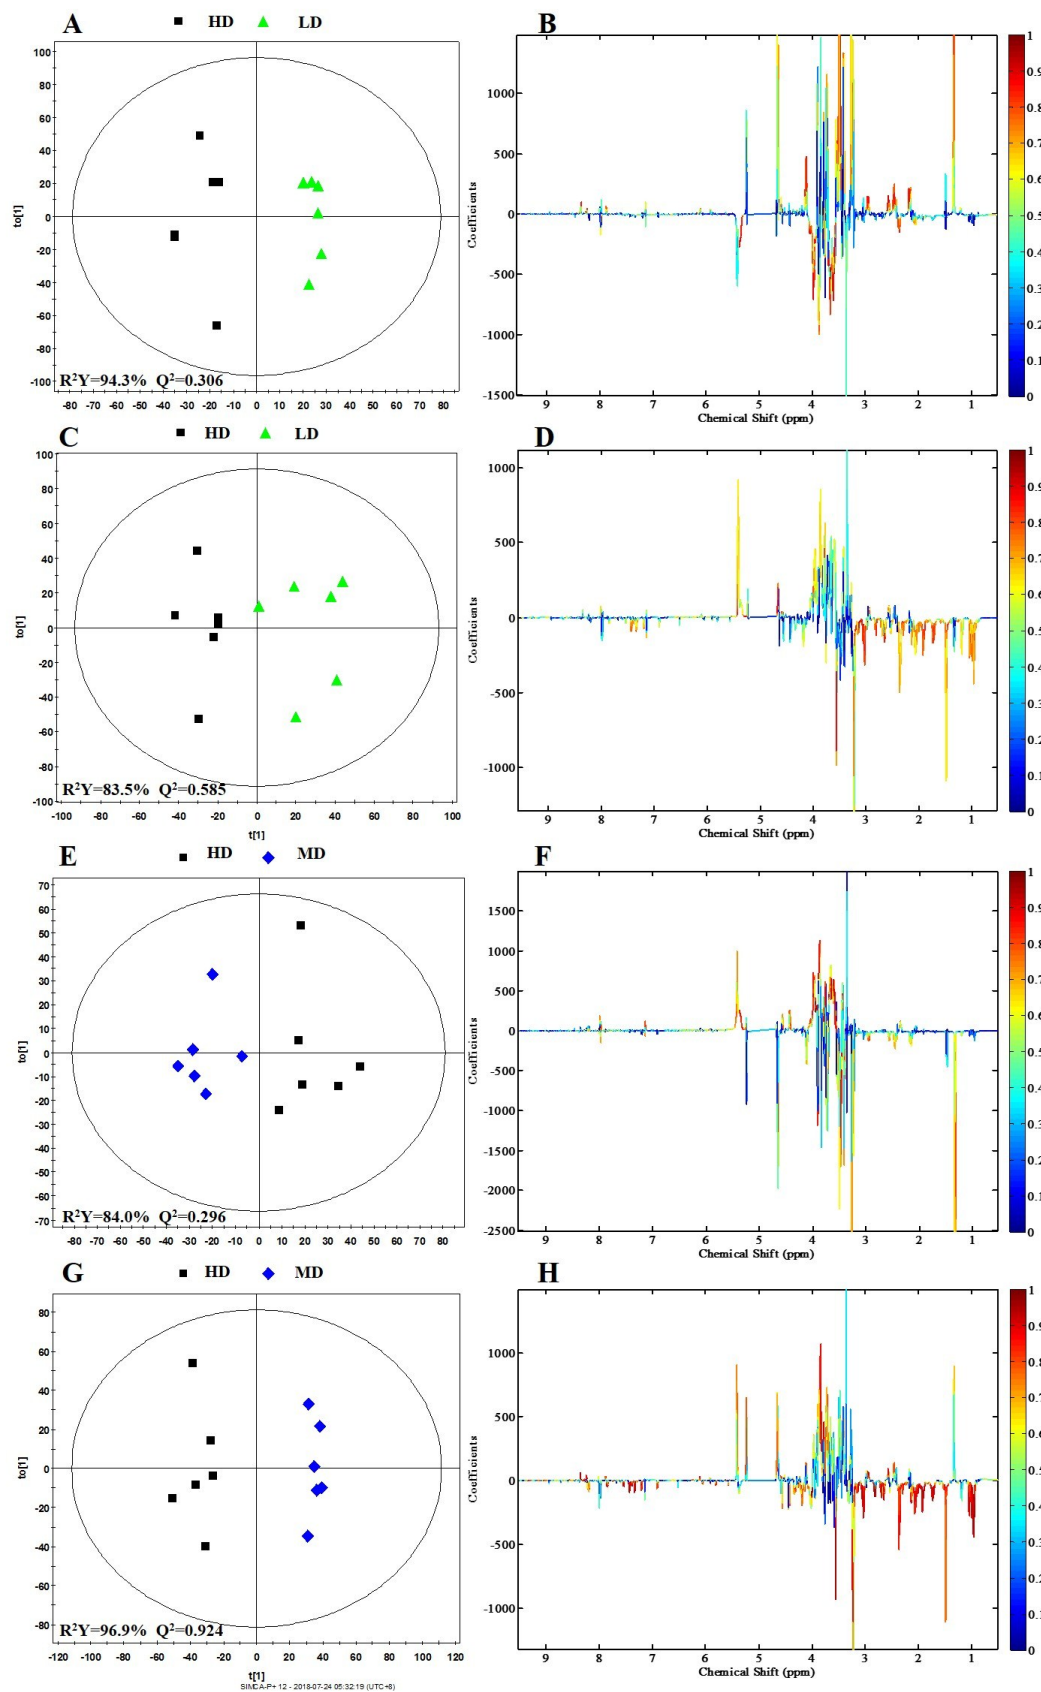

**Fig. S4.** OPLS-DA scores plots (A, C, E and G) and coefficient loading plots (B, D, F and H) derived from  $^1\text{H}$  NMR spectra of liver from LD/ NC and MD/ NC group at day 15 and day 30.

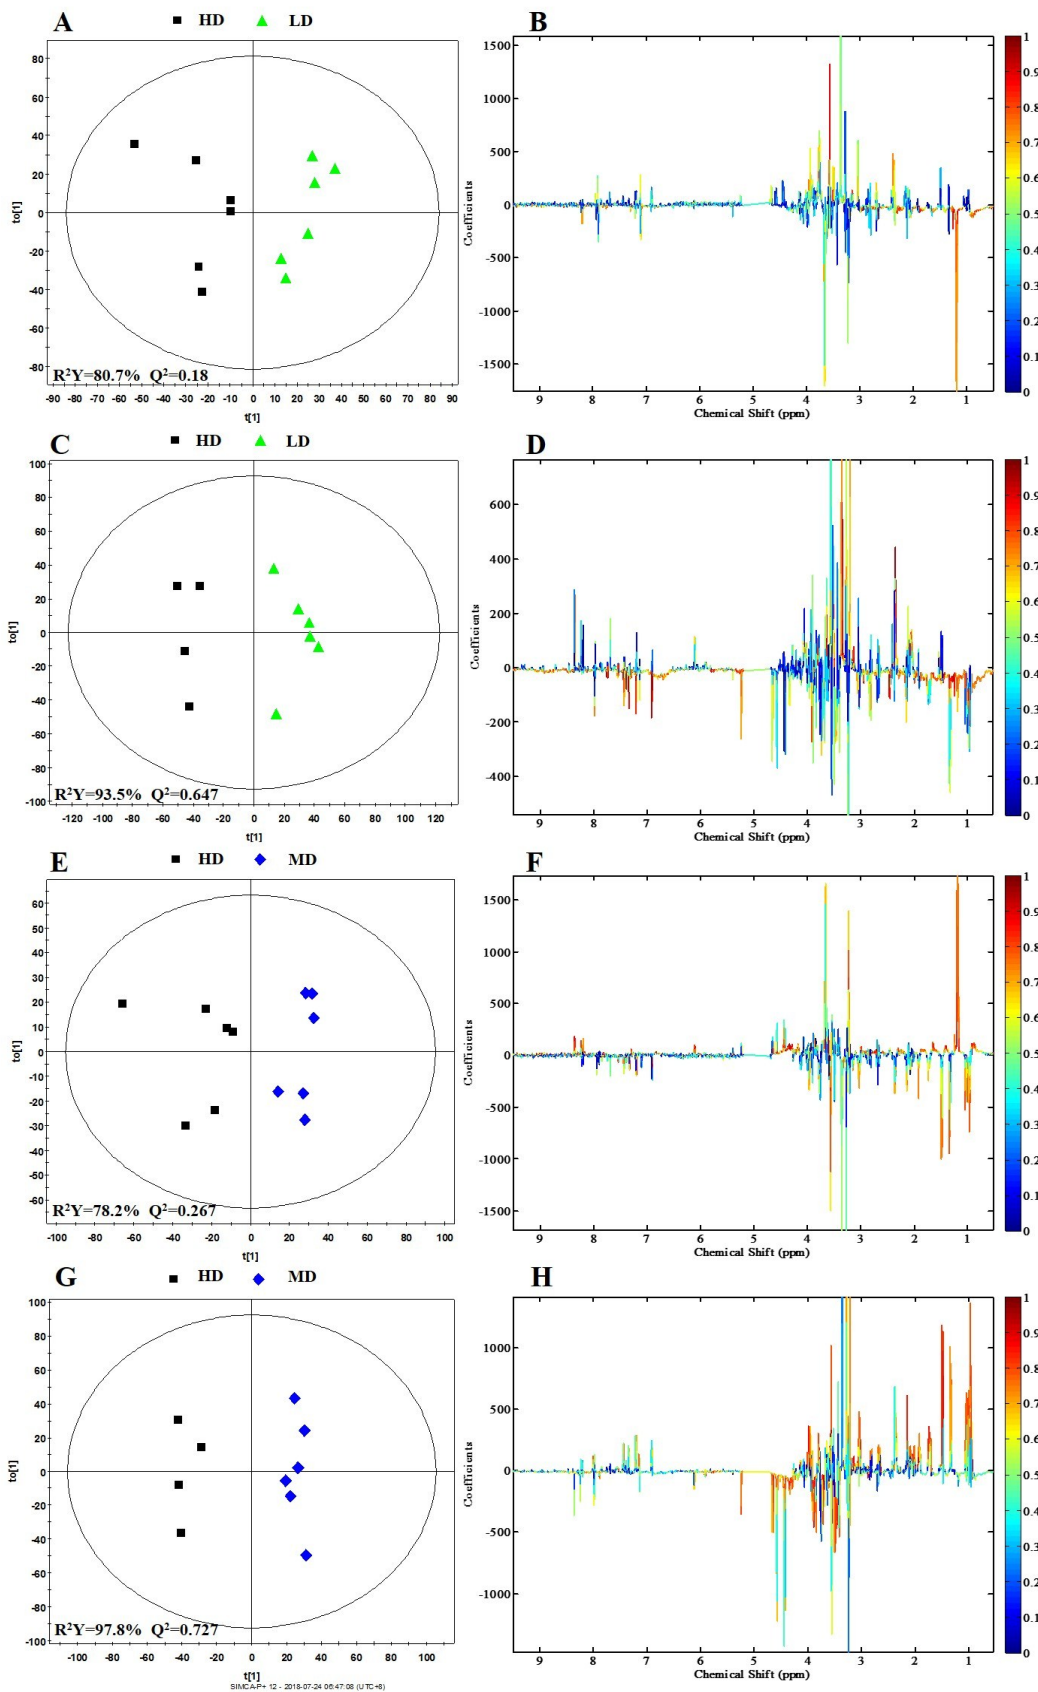

**Fig. S5.** OPLS-DA scores plots (A, C, E and G) and coefficient loading plots (B, D, F and H) derived from 1H NMR spectra of kidney from LD/ NC and MD/ NC group at day 15 and day 30.

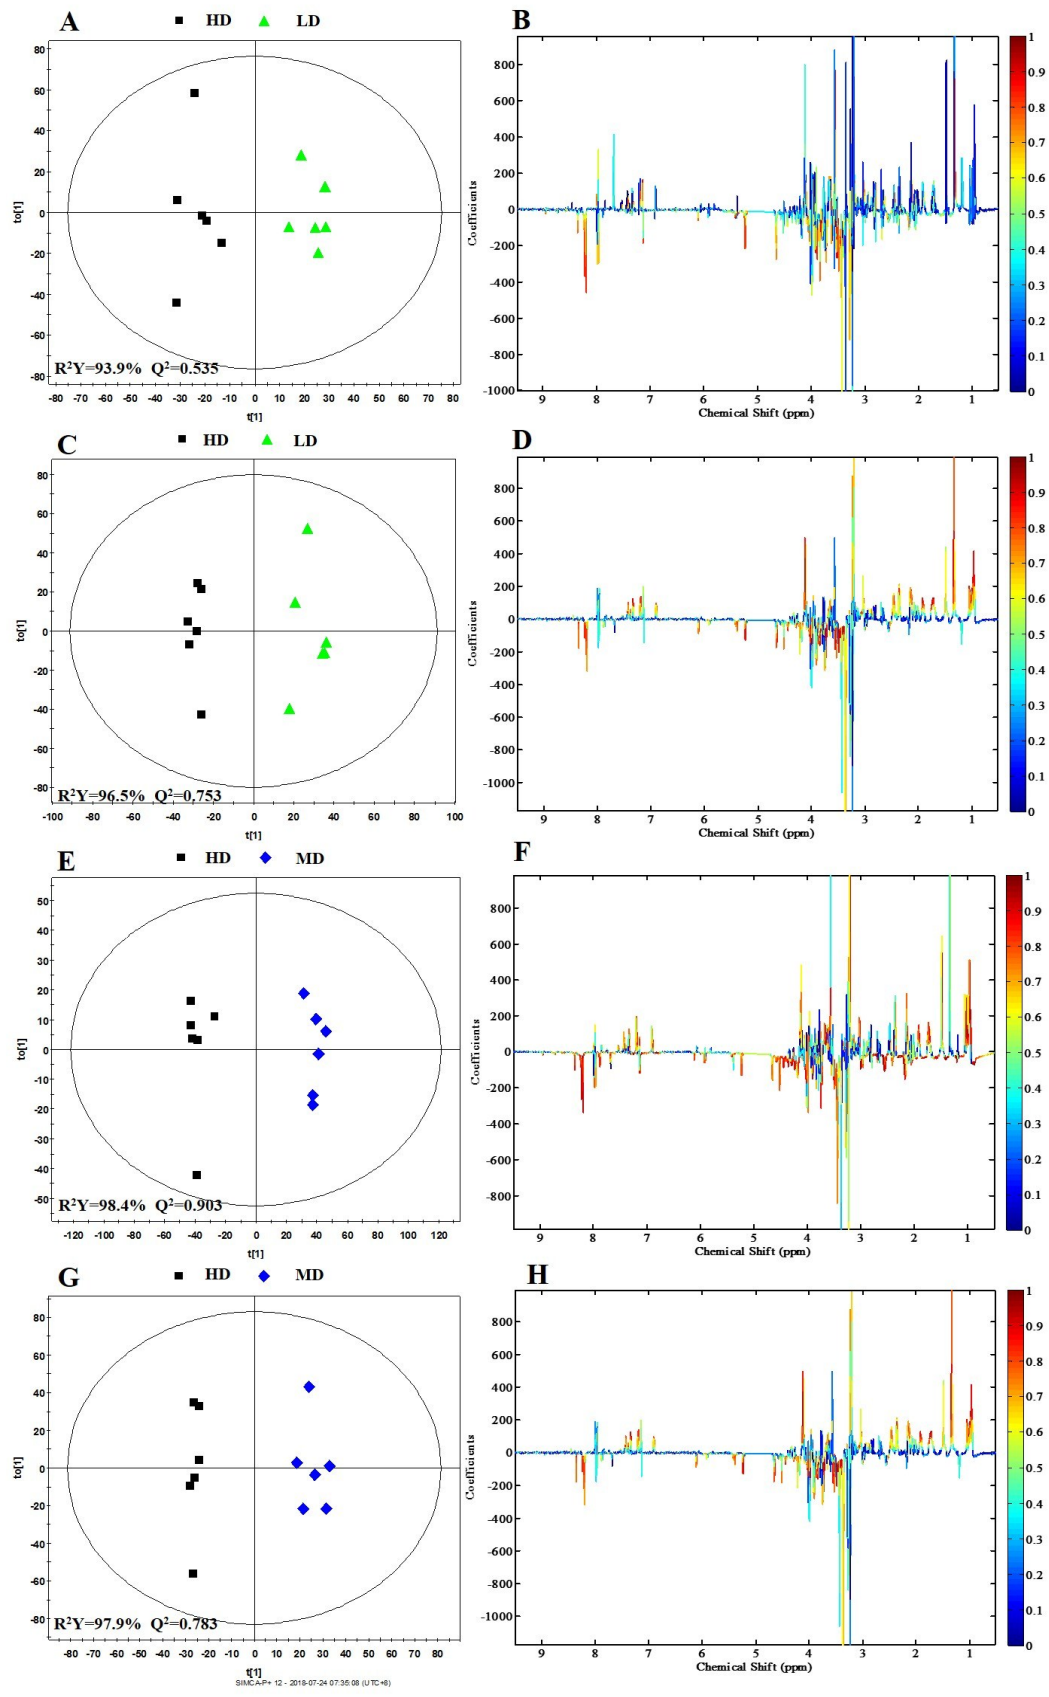

**Fig. S6.** OPLS-DA scores plots (A, C, E and G) and coefficient loading plots (B, D, F and H) derived from 1H NMR spectra of spleen from LD/ NC and MD/ NC group at day 15 and day 30.

**Table S1. The level of serum biochemical indices of RQCJ successive administration ( $\bar{x} \pm s$ ).**

|        | Biochemical indices | HD group    | MD group    | LD group    | NC group    |
|--------|---------------------|-------------|-------------|-------------|-------------|
| Day 15 | AST (IU/L)          | 224.28±35.0 | 190.6±56.91 | 136.8±14.1  | 152.9±52.3  |
|        | ALT (IU/L)          | 61.33±8.33  | 56.67±10.0  | 52.06±2.82* | 54.85±10.7  |
|        | ALP (IU/L)          | 327.3±73.1* | 293.2±28.5* | 323.6±29.6  | 347.8±15.28 |
|        | BUN (mmol/L)        | 7.717±1.28* | 7.933±0.42* | 6.880±1.18  | 9.432±1.54  |
|        | CHE (IU/L)          | 28.45±9.12  | 26.35±6.11  | 19.34±1.38* | 28.67±15.28 |
| Day 30 | AST (IU/L)          | 203.0±58.2  | 196.3±48.67 | 177.4±41.4  | 193.6±43.0  |
|        | ALT (IU/L)          | 60.13±10.3  | 48.62±4.13* | 57.22±3.98  | 57.18±9.16  |
|        | ALP(IU/L)           | 265.6±34.1  | 259.7±33.0  | 252.7±47.8  | 268.3±84.03 |
|        | BUN (mmol/L)        | 8.935±0.87  | 7.517±0.95  | 9.020±1.40  | 9.395±0.44  |
|        | CHE (IU/L)          | 28.47±4.06  | 31.15±5.68  | 32.86±4.86  | 33.67±4.08  |

Note:\* compared with control group,  $p < 0.05$



**Table S2. Results from Pathway Analysis with MetPA from liver.**

| <b>Pathway Name</b>                                 | <b>Total</b> | <b>Hits</b> | <b>Raw p</b> | <b>=-LOG(p)</b> | <b>Holm P</b> | <b>FDR</b> | <b>Impact</b> |
|-----------------------------------------------------|--------------|-------------|--------------|-----------------|---------------|------------|---------------|
| D-Glutamine and D-glutamate metabolism              | 5            | 2           | 0.000363     | 7.9214          | 0.029033      | 0.013544   | 1             |
| Phenylalanine, tyrosine and tryptophan biosynthesis | 4            | 1           | 0.025458     | 3.6707          | 1             | 0.34369    | 0.5           |
| Alanine, aspartate and glutamate metabolism         | 24           | 2           | 0.0094       | 4.6671          | 0.72378       | 0.15228    | 0.40928       |
| Phenylalanine metabolism                            | 9            | 1           | 0.05647      | 2.874           | 1             | 0.50823    | 0.40741       |
| Histidine metabolism                                | 15           | 2           | 0.003685     | 5.6034          | 0.28745       | 0.074627   | 0.24194       |
| Nicotinate and nicotinamide metabolism              | 13           | 1           | 0.080645     | 2.5177          | 1             | 0.65322    | 0.2381        |
| Glyoxylate and dicarboxylate metabolism             | 16           | 1           | 0.098413     | 2.3186          | 1             | 0.72441    | 0.11111       |

Total is the total number of compounds in the pathway; the hits is the actually matched number from the user uploaded data; the raw p is the original p value calculated from the enrichment analysis; the impact is the pathway impact value calculated from pathway topology analysis.

**Table S3. Results from Pathway Analysis with MetPA from kidney.**

| <b>Pathway Name</b>                                 | <b>Total</b> | <b>Hits</b> | <b>Raw p</b> | <b>=-LOG(p)</b> | <b>Holm P</b> | <b>FDR</b> | <b>Impact</b> |
|-----------------------------------------------------|--------------|-------------|--------------|-----------------|---------------|------------|---------------|
| Phenylalanine, tyrosine and tryptophan biosynthesis | 4            | 2           | 0.000472     | 7.6595          | 0.037252      | 0.012732   | 1             |
| D-Glutamine and D-glutamate metabolism              | 5            | 1           | 0.045574     | 3.0884          | 1             | 0.24968    | 1             |
| Valine, leucine and isoleucine biosynthesis         | 11           | 2           | 0.004167     | 5.4806          | 0.3125        | 0.048214   | 0.66666       |
| Alanine, aspartate and glutamate metabolism         | 24           | 4           | 4.27E-05     | 10.061          | 0.003419      | 0.001731   | 0.45253       |
| Taurine and hypotaurine metabolism                  | 8            | 1           | 0.071991     | 2.6312          | 1             | 0.32396    | 0.42857       |
| Phenylalanine metabolism                            | 9            | 2           | 0.002756     | 5.894           | 0.21221       | 0.037206   | 0.40741       |
| Glycine, serine and threonine metabolism            | 32           | 3           | 0.002647     | 5.9342          | 0.20648       | 0.037206   | 0.29197       |
| Tyrosine metabolism                                 | 42           | 1           | 0.32775      | 1.1155          | 1             | 1          | 0.14045       |
| Arginine and proline metabolism                     | 44           | 3           | 0.006624     | 5.0171          | 0.49018       | 0.067068   | 0.10545       |

Total is the total number of compounds in the pathway; the hits is the actually matched number from the user uploaded data; the raw p is the original p value calculated from the enrichment analysis; the impact is the pathway impact value calculated from pathway topology analysis.

**Table S4. Results from Pathway Analysis with MetPA from spleen.**

| <b>Pathway Name</b>                                 | <b>Total</b> | <b>Hits</b> | <b>Raw p</b> | <b>=-LOG(p)</b> | <b>Holm P</b> | <b>FDR</b> | <b>Impact</b> |
|-----------------------------------------------------|--------------|-------------|--------------|-----------------|---------------|------------|---------------|
| Phenylalanine, tyrosine and tryptophan biosynthesis | 4            | 2           | 0.000723     | 7.2316          | 0.057147      | 0.019531   | 1             |
| D-Glutamine and D-glutamate metabolism              | 5            | 1           | 0.055852     | 2.8851          | 1             | 0.41127    | 1             |
| Valine, leucine and isoleucine biosynthesis         | 11           | 2           | 0.006328     | 5.0628          | 0.48094       | 0.08543    | 0.66666       |
| Alanine, aspartate and glutamate metabolism         | 24           | 4           | 0.000105     | 9.1608          | 0.008406      | 0.004256   | 0.45569       |
| Taurine and hypotaurine metabolism                  | 8            | 1           | 0.087945     | 2.431           | 1             | 0.49822    | 0.42857       |
| Phenylalanine metabolism                            | 9            | 2           | 0.004198     | 5.4732          | 0.32322       | 0.068003   | 0.40741       |
| Tryptophan metabolism                               | 41           | 1           | 0.37965      | 0.96849         | 1             | 1          | 0.15684       |
| Tyrosine metabolism                                 | 42           | 2           | 0.080649     | 2.5176          | 1             | 0.49822    | 0.14045       |
| Glyoxylate and dicarboxylate metabolism             | 16           | 1           | 0.1686       | 1.7802          | 1             | 0.75869    | 0.11111       |
| Arginine and proline metabolism                     | 44           | 4           | 0.001168     | 6.7524          | 0.091114      | 0.023655   | 0.10545       |

Total is the total number of compounds in the pathway; the hits is the actually matched number from the user uploaded data; the raw p is the original p value calculated from the enrichment analysis; the impact is the pathway impact value calculated from pathway topology analysis.

**Table S5. Concentrations of As and Hg in control and dosed-group tissues sample.**

| sample | time points | Element | Control group | Low dosed group | Medium dosed group | High dosed group |
|--------|-------------|---------|---------------|-----------------|--------------------|------------------|
| Liver  | 15 day      | As      | 0.593±0.05    | 1.816±0.21*     | 3.696±0.50*        | 9.963±1.53*      |
|        |             | Hg      | 0.658±0.19    | 1.749±0.21*     | 4.039±1.09*        | 9.891±1.52*      |
|        | 30 day      | As      | 0.970±0.14    | 1.923±0.29      | 4.099±0.41*        | 8.938±1.48       |
|        |             | Hg      | 0.332±0.05    | 0.451±0.11      | 0.632±0.27*        | 0.839±0.56*      |
| Kidney | 15 day      | As      | 1.208±0.28    | 2.942±0.14*     | 6.862±0.62*        | 19.75±5.67*      |
|        |             | Hg      | 0.159±0.03    | 2.173±0.38*     | 3.909±1.28*        | 8.840±1.79*      |
|        | 30 day      | As      | 1.397±0.35    | 2.982±0.58*     | 6.711±0.54*        | 16.04±2.60*      |
|        |             | Hg      | 0.105±0.04    | 2.553±0.71*     | 4.463±0.88*        | 6.266±0.95*      |
| Spleen | 15 day      | As      | 5.037±1.21    | 13.90±3.75*     | 28.46±4.04*        | 58.13±16.17*     |
|        |             | Hg      | Non-Detected  | Non-Detected    | Non-Detected       | Non-Detected     |
|        | 30 day      | As      | 5.307±1.38    | 13.52±2.83*     | 33.29±8.06*        | 77.59±15.36*     |
|        |             | Hg      | Non-Detected  | Non-Detected    | Non-Detected       | Non-Detected     |

Data were presented as mean±SD of n=8 animals per groups. Statistical analysis was performed by one-way ANOVA followed by Dunnett's test.

\* P<0.05 versus control group. \* \*P<0.01 versus control group.
